# Supplementary material
Source: HighWire-hosted journal article supplement (https://lupus.bmj.com/content/10/1/e000830)
Supplement: inline-supplementary-material-1 [file inline-supplementary-material-1.pdf]

## Supplementary Material

### Supplementary methods

#### Key inclusion criteria

Key inclusion criteria for the studies were: aged  $\geq 18$  years; diagnosis of SLE according to American College of Rheumatology (ACR) revised criteria; active disease at screening (defined by most included studies as Safety of Estrogens in Lupus Erythematosus National Assessment version of the Systemic Lupus Erythematosus Disease Activity Index [SELENA-SLEDAI] score  $\geq 4$ , 6, or 8); seropositivity (antinuclear antibody titer  $\geq 1:80$  and/or anti-double-stranded deoxyribonucleic acid antibody level  $\geq 30$  IU/mL; history of measurable autoantibodies was required by Study LBSL02); stable treatment regimen at screening or for  $\geq 30$  or  $\geq 60$  days, depending on the study, before the first study dose.

## Supplementary Figure 1. Study design

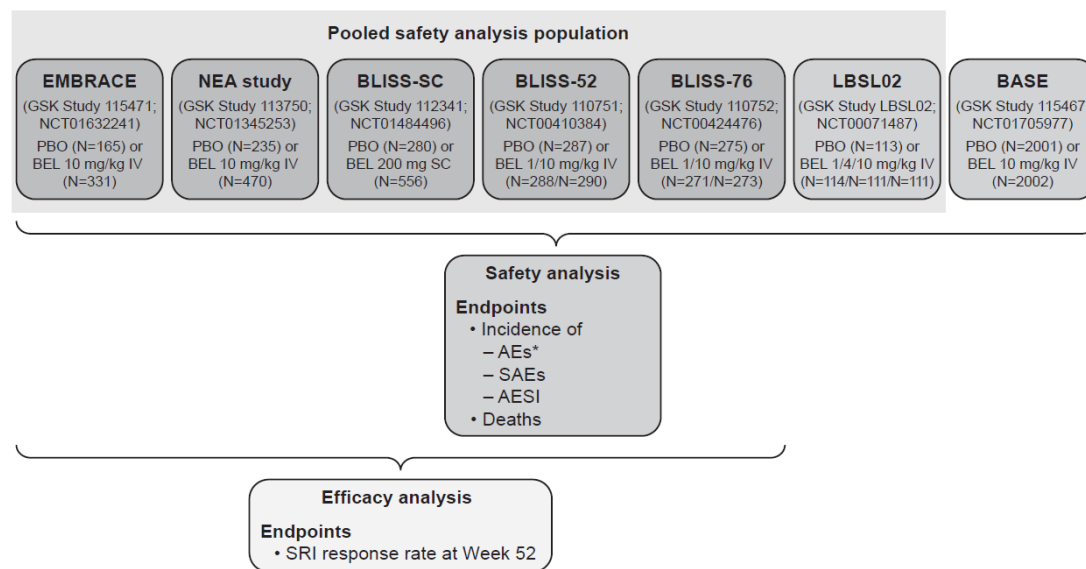

\*Only data on SAEs, AESI, and deaths were collected for BASE.[1]

AEs, adverse events; AESI, AEs of special interest; BEL, belimumab; IV, intravenous; SAEs, serious adverse events; SC, subcutaneous; SRI, Systemic Lupus Erythematosus Responder Index.

Supplementary Table 1. AEFI and deaths in older adult and the overall populations

| n (%) <sup>†</sup>                                                                                     | Pooled safety analysis population* |             |                  |               | BASE                 |             |                  |               |
|--------------------------------------------------------------------------------------------------------|------------------------------------|-------------|------------------|---------------|----------------------|-------------|------------------|---------------|
|                                                                                                        | Older adults (N=63)                |             | Overall (N=4170) |               | Older adults (N=156) |             | Overall (N=4003) |               |
|                                                                                                        | PBO<br>N=27                        | BEL<br>N=36 | PBO<br>N=1355    | BEL<br>N=2815 | PBO<br>N=82          | BEL<br>N=74 | PBO<br>N=2001    | BEL<br>N=2002 |
| <b>Death<sup>‡</sup></b>                                                                               | 0 (0.0)                            | 0 (0.0)     | 6 (0.4)          | 16 (0.6)      | 1 (1.2)              | 1 (1.4)     | 11 (0.6)         | 12 (0.6)      |
| <b>AEFI</b>                                                                                            |                                    |             |                  |               |                      |             |                  |               |
| <b>PISR<sup>§,¶,**</sup></b>                                                                           | 0 (0.0)                            | 2 (5.6)     | 110 (8.1)        | 286 (10.2)    | -                    | -           | -                | -             |
| Serious PISR                                                                                           | 0 (0.0)                            | 0 (0.0)     | 2 (0.1)          | 13 (0.5)      | 0 (0.0)              | 0 (0.0)     | 2 (<0.1)         | 8 (0.4)       |
| <b>Infections of special interest (opportunistic, herpes zoster, tuberculosis, sepsis)<sup>§</sup></b> |                                    |             |                  |               |                      |             |                  |               |
| Serious infections of special interest                                                                 | 0 (0.0)                            | 0 (0.0)     | 17 (1.3)         | 40 (1.4)      | 0 (0.0)              | 2 (2.7)     | 17 (0.8)         | 17 (0.8)      |
| <b>Malignancies (ex. non-melanoma skin cancer)<sup>§</sup></b>                                         |                                    |             |                  |               |                      |             |                  |               |
| Depression <sup>§,**,††</sup>                                                                          | 3 (11.1)                           | 3 (8.3)     | 92 (6.8)         | 205 (7.3)     | -                    | -           | -                | -             |
| Serious depression <sup>††</sup>                                                                       | 1 (3.7)                            | 0 (0.0)     | 2 (0.1)          | 6 (0.2)       | 0 (0.0)              | 0 (0.0)     | 1 (<0.1)         | 7 (0.3)       |
| <b>Suicide/self-injury<sup>**,††</sup></b>                                                             |                                    |             |                  |               |                      |             |                  |               |
| Serious suicide/self-injury                                                                            | 0 (0.0)                            | 0 (0.0)     | 4 (0.3)          | 8 (0.3)       | -                    | -           | -                | -             |
| Serious suicide/self-injury                                                                            | 0 (0.0)                            | 0 (0.0)     | 4 (0.3)          | 4 (0.1)       | 0 (0.0)              | 1 (1.4)     | 5 (0.2)          | 11 (0.5)      |

\*Pooled data from all studies except BASE; †patients counted once/category; ‡BASE: fatal SAEs that started during on-treatment period; death may have occurred after period end. Pooled safety analysis: all deaths during double-blind period; §per custom MedDRA query; ¶occurring on/within 3 days of infusion/injection; \*\*BASE: only serious PISR and serious depression/suicide/self-injury events collected; ††including mood disorders/anxiety; ††per standard MedDRA query.

AE, adverse event; AESI, AEs of special interest; BEL, belimumab; MedDRA, Medical Dictionary for Regulatory Activities; PBO, placebo; PISR, post-infusion/injection systemic reaction; SAEs, serious adverse events.

Supplementary Table 2. Components of SRI response at Week 52 for older adults and the overall populations

|                                            | Treatment, n/N (%) |               |                   |                    |                  | Observed<br>difference<br>vs PBO, % | Odds ratio (95% CI)<br>vs PBO* |
|--------------------------------------------|--------------------|---------------|-------------------|--------------------|------------------|-------------------------------------|--------------------------------|
|                                            | PBO                | Pooled<br>BEL | BEL IV<br>1 mg/kg | BEL IV<br>10 mg/kg | BEL SC<br>200 mg |                                     |                                |
| <b>≥4-point reduction in SELENA-SLEDAI</b> |                    |               |                   |                    |                  |                                     |                                |
| Older adults                               | 8/25 (32.0)        | 12/29 (41.4)  | -                 | -                  | -                | 9.38                                | 1.49 (0.49, 4.58)              |
| Overall                                    |                    |               |                   |                    |                  |                                     |                                |
| BLISS-76 and                               | 230/562 (40.9)     | -             | 269/559 (48.1)    | -                  | -                | 7.20                                | 1.40 (1.10, 1.79)              |
| BLISS-52 (pooled)                          |                    | -             | -                 | 297/563 (52.8)     | -                | 11.83                               | 1.68 (1.32, 2.15)              |
| NEA study                                  | 91/217 (41.9)      | -             | -                 | 249/446 (55.8)     | -                | 13.89                               | 2.01 (1.42, 2.86)              |
| EMBRACE                                    | 63/149 (42.3)      | -             | -                 | 149/298 (50.0)     | -                | 7.72                                | 1.46 (0.97, 2.20)              |
| BLISS-SC                                   | 137/279 (49.1)     | -             | -                 | -                  | 345/554 (62.3)   | 13.17                               | 1.69 (1.26, 2.27)              |
| <b>No worsening in PGA</b>                 |                    |               |                   |                    |                  |                                     |                                |
| Older adults                               | 17/25 (68.0)       | 20/29 (69.0)  | -                 | -                  | -                | 0.97                                | 1.12 (0.34, 3.67)              |

|                                         |                |              |                |                |                |       |                   |
|-----------------------------------------|----------------|--------------|----------------|----------------|----------------|-------|-------------------|
| Overall                                 |                |              |                |                |                |       |                   |
| BLISS-76 and                            | 372/562 (66.2) | -            | 424/559 (75.8) | -              | -              | 9.66  | 1.62 (1.24, 2.11) |
| BLISS-52 (pooled)                       |                | -            | -              | 420/563 (74.6) | -              | 8.41  | 1.52 (1.17, 1.97) |
| NEA study                               | 149/217 (68.7) | -            | -              | 345/446 (77.4) | -              | 8.69  | 1.57 (1.09, 2.27) |
| EMBRACE                                 | 96/149 (64.4)  | -            | -              | 207/298 (69.5) | -              | 5.03  | 1.26 (0.82, 1.93) |
| BLISS-SC                                | 203/279 (72.8) | -            | -              | -              | 450/554 (81.2) | 8.47  | 1.61 (1.15, 2.27) |
| <b>No new 1A/2B BILAG domain scores</b> |                |              |                |                |                |       |                   |
| Older adults                            | 18/25 (72.0)   | 20/29 (69.0) | -              | -              | -              | -3.03 | 0.85 (0.26, 2.78) |
| Overall                                 |                |              |                |                |                |       |                   |
| BLISS-76 and                            | 389/562 (69.2) | -            | 429/559 (76.7) | -              | -              | 7.53  | 1.48 (1.13, 1.94) |
| BLISS-52 (pooled)                       |                | -            | -              | 425/563 (75.5) | -              | 6.27  | 1.38 (1.05, 1.80) |
| NEA study                               | 148/217 (68.2) | -            | -              | 358/446 (80.3) | -              | 12.07 | 1.91 (1.32, 2.77) |
| EMBRACE                                 | 93/149 (62.4)  | -            | -              | 202/298 (67.8) | -              | 5.37  | 1.24 (0.81, 1.88) |
| BLISS-SC                                | 207/279 (74.2) | -            | -              | -              | 448/554 (80.9) | 6.67  | 1.46 (1.04, 2.07) |

\*In the pooled efficacy analysis (older adults), covariates were treatment and baseline SELENA-SLEDAI score ( $\leq 9$  vs  $\geq 10$ ). For BLISS-76 and BLISS-52, covariates included treatment, baseline SELENA-SLEDAI score ( $\leq 9$  vs  $\geq 10$ ), baseline proteinuria level ( $< 2$  vs  $\geq 2$  g/24 h equivalent), and race (Black African ancestry vs other). For BLISS-SC, covariates were treatment, baseline SELENA-SLEDAI score ( $\leq 9$  vs  $\geq 10$ ), baseline complement levels (low C3 and/or C4 vs no low C3/C4), and race (Black African ancestry vs other). For the NEA study independent variables were treatment, country, baseline SELENA-SLEDAI score ( $\leq 9$  vs  $\geq 10$ ), and complement levels (low C3 and/or C4 vs no low C3/C4). For EMBRACE, covariates were treatment, baseline SELENA-SLEDAI score ( $\leq 9$  vs  $\geq 10$ ), baseline complement levels (low C3 and/or C4 vs no low C3/C4), and region (United States/Canada vs rest of world).

BEL, belimumab; BILAG, British Isles Lupus Assessment Group; CI, confidence interval; IV, intravenous; PBO, placebo; PGA, Physicians Global Assessment; SC, subcutaneous; SELENA-SLEDAI, Safety of Estrogens in Lupus Erythematosus National Assessment - Systemic Lupus Erythematosus Disease Activity Index; SRI, Systemic Lupus Erythematosus Responder Index.

**REFERENCES**

1. Sheikh SZ, Scheinberg MA, Wei JC-C, et al. Mortality and adverse events of special interest with intravenous belimumab for adults with active, autoantibody-positive systemic lupus erythematosus (BASE): a multicentre, double-blind, randomised, placebo-controlled, phase 4 trial. *Lancet Rheumatol* 2021;3:e122-e30. doi: 10.1016/s2665-9913(20)30355-6.
